# Supplementary material for: A duplex nested RT-PCR method for monitoring porcine epidemic diarrhea virus and porcine delta-coronavirus
Source: Research Square preprint supplement (doi:10.21203/rs.3.rs-1749345/v1), 2022-06-13
Supplement: Supplementary file 1 [file 2ecb876a3bc9402db819615a.xlsx]

## Sheet: Sheet1
Sequence	Accession number
PDCoV 1	SRR19515905
PDCoV 2	SRR19515904
PDCoV 3	SRR19515894
PDCoV 4	SRR19515893
PDCoV 7	SRR19515892
PDCoV 8	SRR19515891
PDCoV 10	SRR19515890
PDCoV 11	SRR19515889
PDCoV 13	SRR19515888
PDCoV 14	SRR19515887
PDCoV 15	SRR19515903
PDCoV 19	SRR19515902
PDCoV 20	SRR19515901
PDCoV 21	SRR19515900
PDCoV 22	SRR19515899
PDCoV 23	SRR19515898
PDCoV 25	SRR19515897
PDCoV 26	SRR19515896
PDCoV 27	SRR19515895
