# Supplementary material for: A duplex nested RT-PCR method for monitoring porcine epidemic diarrhea virus and porcine delta-coronavirus
Source: Research Square preprint supplement (doi:10.21203/rs.3.rs-1749345/v1), 2022-06-13
Supplement: Supplementary file 2 [file e6e9e162f2679e9849dfc203.xlsx]

## Sheet: Sheet1
Sequence	Accession number
PEDV1	SRR19519954
PEDV2	SRR19519953
PEDV3	SRR19519952
PEDV4	SRR19519951
PEDV5	SRR19519950
PEDV6	SRR19519949
PEDV7	SRR19519948
PEDV8	SRR19519947
PEDV9	SRR19519946
